# Supplementary material for: Detection and Molecular Characterization of Picobirnaviruses (PBVs) in the Mongoose: Identification of a Novel PBV Using an Alternative Genetic Code
Source: MDPI journal article supplement (doi:10.3390/v12010099), 2020-01-15
Supplement: s1 [file s1]

**Supplementary material S4.** Alignment of the complete/nearly complete nucleotide (nt) sequences (full-length minus partial 3'-UTR) of gene segment-2/RNA-dependent RNA polymerase (RdRp) genes of picobirnavirus (PBV) and PBV-like strains detected in the small Indian mongoose on the Caribbean island of St. Kitts with that of prototype PBV genogroup-I strain PBV/Human/CHN/1-CHN-97/1997. A '\*' denotes an identical nt residue, whilst '-' indicates absence of a nt residue. The 5'- terminal sequence, the bacterial ribosomal binding site (RBS) sequence and the 3'- terminal sequence that are conserved in PBVs is shown with yellow, blue and pink, respectively. The putative start codon (ATG) and stop codon (TAA) for the putative RdRp gene of mongoose PBV GI strains is highlighted with green and red, respectively, whilst those of PBV-like strain PBV-like/Mongoose/KNA/M17A/2017 is shown with grey and teal, respectively. Numbers to the right indicate the positions of the nt for respective PBV strains.

|                                 |                                                      |                  |
|---------------------------------|------------------------------------------------------|------------------|
| PBV-like/Mongoose/KNA/M17A/2017 | GTAAATTTTCAAATTTTCTA-TTTCTATGAAATTTTAAATTGCGTGATT    | 49               |
| PBV/Mongoose/KNA/M17B/2017      | GTAAATTTTCTTACTT-----TTAC-AAATAAT-----               | 27               |
| PBV/Mongoose/KNA/M33/2017       | GTAAATTTTCT---TT-----TTAC-TTCTATTTAATTCTTAAGAT       | 37               |
| PBV/Mongoose/KNA/M45/2017       | GTAAATTTTAA--CT-----TTAC-A-CTATT-----T               | 25               |
| PBV/Mongoose/KNA/M46/2017       | GTAA-TTTCTA--TTAA-----TTAC-AAATTTT-----              | 26               |
| PBV/Mongoose/KNA/M58/2017       | GTAAATTTTAA--CT-----TTAC-A-CTATT-----T               | 25               |
| PBV/Mongoose/KNA/M67/2017       | GTAAATTTTAA--CT-----TTAC-A-CTATT-----T               | 25               |
| PBV/Mongoose/KNA/M72/2017       | GTAAATTTTGTAA--TT-----TTAC-A-ATATTCAGAAAGGAGT        | 37               |
| PBV/Human/CHN/1-CHN-97/1997     | GTAAATTTTGTATTCTTGAAACATTTC-AAATTTA-----             | 36               |
|                                 | ***** **                                             | ** *             |
| PBV-like/Mongoose/KNA/M17A/2017 | -----TACTGAAAACGCTTACAGTGGCAG                        | 73               |
| PBV/Mongoose/KNA/M17B/2017      | -----TTG-----                                        | 30               |
| PBV/Mongoose/KNA/M33/2017       | CCTTTCGGATCGAATTTCAAATCTTATTTTGACTTTCTTTTGAAATTAA    | 87               |
| PBV/Mongoose/KNA/M45/2017       | -----CTTTG-----                                      | 30               |
| PBV/Mongoose/KNA/M46/2017       | -----ATG-----                                        | 29               |
| PBV/Mongoose/KNA/M58/2017       | -----CTTTG-----                                      | 30               |
| PBV/Mongoose/KNA/M67/2017       | -----CTTTG-----                                      | 30               |
| PBV/Mongoose/KNA/M72/2017       | -----TTTTGTAAAC-----AAATTTCAA                        | 56               |
| PBV/Human/CHN/1-CHN-97/1997     | -----TTTG-----                                       | 40               |
|                                 |                                                      | **               |
| PBV-like/Mongoose/KNA/M17A/2017 | ATAACTGTATACATTTTCAGGAGGTTAGTTTCTTTGTGATTAAGA--AGCTA | 121              |
| PBV/Mongoose/KNA/M17B/2017      | --AA-----AGGAGGTT--CACGTTATGCCTAAAAATAACGT           | 63               |
| PBV/Mongoose/KNA/M33/2017       | AGAA-----AGGAGGCT--ACACTATGCCTAAAAGTAGTGA            | 121              |
| PBV/Mongoose/KNA/M45/2017       | --AA-----AGGAGGTT--CACATTATGCCTAAAAATAATGT           | 63               |
| PBV/Mongoose/KNA/M46/2017       | --AA-----AGGAGGCTA-CTCAATATGCCTAAAAATAATGTGA         | 63               |
| PBV/Mongoose/KNA/M58/2017       | --AA-----AGGAGGTT--CACATTATGCCTAAAAATAATGT           | 63               |
| PBV/Mongoose/KNA/M67/2017       | --AA-----AGGAGGTT--CACATTATGCCTAAAAATAATGT           | 63               |
| PBV/Mongoose/KNA/M72/2017       | AGAA-----AGGAGGTT--CGCGTTATGCCTAAAAATAACGT           | 91               |
| PBV/Human/CHN/1-CHN-97/1997     | --AA-----AGGAGGCAA-ATCGTTATGCCTAAAAATAACGA           | 74               |
|                                 | **                                                   | ***** * ** * * * |
| PBV-like/Mongoose/KNA/M17A/2017 | AACT-----TGAAGGACTAT-----TTCATCC-----TTC-C           | 147              |
| PBV/Mongoose/KNA/M17B/2017      | AACA--AGTT-TTATTAATAACCACTTCGTGGATACTAAC-----TACAC   | 105              |
| PBV/Mongoose/KNA/M33/2017       | AACT--AATT-TTGGTAAGTAT-----TTTAAAC-----TAC-C         | 151              |
| PBV/Mongoose/KNA/M45/2017       | AATT--AAAT-TCGATAATTGC-----TTTCAAT-----TAC-C         | 93               |
| PBV/Mongoose/KNA/M46/2017       | AAACGGAACATATTGGTAAATAT-----TTCGATT-----TAC-C        | 96               |
| PBV/Mongoose/KNA/M58/2017       | AATT--AAAT-TCGATAATTGC-----TTTCAAT-----TAC-C         | 93               |
| PBV/Mongoose/KNA/M67/2017       | AATT--AAAT-TCGATAATTGC-----TTTCAAT-----TAC-C         | 93               |
| PBV/Mongoose/KNA/M72/2017       | AACT--AAGT-CAGTCGAGTAC-----TA-CAATAGTAGTTT-C         | 125              |
| PBV/Human/CHN/1-CHN-97/1997     | AGTT--AGTT-TTGGTGAGTAC-----TTTAACT-----TAC-C         | 104              |
|                                 | *                                                    | * *              |

|                                 |                                                    |                       |
|---------------------------------|----------------------------------------------------|-----------------------|
| PBV-like/Mongoose/KNA/M17A/2017 | CAATCAG-----GGTTT---AC-----AGTCTTATTTACACA         | 176                   |
| PBV/Mongoose/KNA/M17B/2017      | GAGTTACTTCACACATAGTGTTTTCCAATCACTTCGGACTTATATGGGCA | 155                   |
| PBV/Mongoose/KNA/M33/2017       | AAATCCG-----GGATT--AAT-----GTCCTATTTTGGCA          | 180                   |
| PBV/Mongoose/KNA/M45/2017       | GAATCAA-----GGTTT--AA-----GGACGTATTTTGGCA          | 122                   |
| PBV/Mongoose/KNA/M46/2017       | AAACCCT-----GGACT--GGT-----GTCATATTTTGCACA         | 125                   |
| PBV/Mongoose/KNA/M58/2017       | GAATCAA-----GGTTT--AA-----GGACGTATTTTGGCA          | 122                   |
| PBV/Mongoose/KNA/M67/2017       | GAATCAA-----GGTTT--AA-----GGACGTATTTTGGCA          | 122                   |
| PBV/Mongoose/KNA/M72/2017       | GACTCAA-----GTCCT--AACT--TACGGACGTATTTTGGCA        | 159                   |
| PBV/Human/CHN/1-CHN-97/1997     | TAATCCG-----GGACT--AA-----AGTCCTATTTTGCACA         | 133                   |
|                                 | *                        *       *                 |                       |
|                                 |                                                    | *     **     *     ** |

|                                 |                                                     |     |
|---------------------------------|-----------------------------------------------------|-----|
| PBV-like/Mongoose/KNA/M17A/2017 | AGACGGAGGTAGGTAGCGACCTTGACATTTCGT---ACTCCGTTTT---GG | 220 |
| PBV/Mongoose/KNA/M17B/2017      | ATGTCGTTAAAGG--ACAGC-CTAAAGTCTACACAGCTCCATTTCGCCAAG | 202 |
| PBV/Mongoose/KNA/M33/2017       | ATGTCAAGAAAGG--ACAAC-CCAACATTTATGACACACCTTTTCGCCAGA | 227 |
| PBV/Mongoose/KNA/M45/2017       | ACGTCGTTAAAGG--ACAAC-CTTATGTGTATGATACGCCTTTTCGCCAGA | 169 |
| PBV/Mongoose/KNA/M46/2017       | TAGTTCAGAAAGG--ACAAC-CTGAAGTGTATAGCACACCATTTGCTAGA  | 172 |
| PBV/Mongoose/KNA/M58/2017       | ACGTCGTTAAAGG--ACAAC-CTTATGTATATGATACGCCTTTTCGCCAGA | 169 |
| PBV/Mongoose/KNA/M67/2017       | ACGTCGTTAAAGG--ACAAC-CTTATGTATATGATACGCCTTTTCGCCAGA | 169 |
| PBV/Mongoose/KNA/M72/2017       | GTGTTGTCAAAG--ACAGT-CCGAAGTTTACGACACGCCCTTCGCCAGG   | 206 |
| PBV/Human/CHN/1-CHN-97/1997     | GAGTT-CGATCAG--GCAATACTGACGAATATCGTACTACATTTTCCGT   | 180 |
|                                 | * * *                                               |     |

|                                 |                                                      |     |
|---------------------------------|------------------------------------------------------|-----|
| PBV-like/Mongoose/KNA/M17A/2017 | ---GACGAGA-AGCCTAGATCATCGATCATGGCGATGTGACAAGCTGTGG   | 266 |
| PBV/Mongoose/KNA/M17B/2017      | ---GGAAGCACAAATTTCAGAGTGT--C--TTGGATGACTGGCAGGAGGTCC | 245 |
| PBV/Mongoose/KNA/M33/2017       | ---GGTGAGTCAACTGAGGAAGCTC--C--TTAGTAAATGGATGGACGTTT  | 270 |
| PBV/Mongoose/KNA/M45/2017       | ---GGCGAATCAACTGCCGAAGCTC--CTATCGGCCTG-GGATAAG-ACCC  | 212 |
| PBV/Mongoose/KNA/M46/2017       | CACAATGGAGGAACACAGAAGGTT--C--TCAAAGACTGGCTGCC-ACAG   | 217 |
| PBV/Mongoose/KNA/M58/2017       | ---GGCGAATCAACTGCCGAAGCTC--CTATCGGCCTG-GGATAAG-ACCC  | 212 |
| PBV/Mongoose/KNA/M67/2017       | ---GGCGAATCAACTGCCGAAGCTC--CTATCGGCCTG-GGATAAG-ACCC  | 212 |
| PBV/Mongoose/KNA/M72/2017       | ---GGCGAATCAACCAAGGAGATG--C--TTGGCAAATGGATGGCTGTGC   | 249 |
| PBV/Human/CHN/1-CHN-97/1997     | ---GGGAGATCATTAGACAGTATC--C--TCAAAGCGTGGAAAGCCAACG-  | 222 |
|                                 | *                        *                           |     |
|                                 | *               *                                    |     |

|                                 |                                                     |     |
|---------------------------------|-----------------------------------------------------|-----|
| PBV-like/Mongoose/KNA/M17A/2017 | TTGACTCTTCAAATCTGGAAGCTAAGTTGCCAGGTTTGATAAAATTTGAG  | 316 |
| PBV/Mongoose/KNA/M17B/2017      | TTGTATC----AA-TTTCTGACAA-GTGGCCTTCTCTGTGGGAGTTTGAG  | 289 |
| PBV/Mongoose/KNA/M33/2017       | TTGTATC----AA-TCAA-GACGCGGTGGCCATCCTTATGGGAGTTTGAA  | 314 |
| PBV/Mongoose/KNA/M45/2017       | TTGTATC----GA-TTAGCGACAA-GTGGCCCTCGCTGTATGAGTTTGAA  | 256 |
| PBV/Mongoose/KNA/M46/2017       | TTGGATA----AAATTTCTGA-ACAGTGGCCAACACTGCTAGAAATTTGAG | 262 |
| PBV/Mongoose/KNA/M58/2017       | TTGTATC----GA-TTAGCGACAA-GTGGCCCTCGCTGTATGAGTTTGAA  | 256 |
| PBV/Mongoose/KNA/M67/2017       | TTGTATC----GA-TTAGCGACAA-GTGGCCCTCGCTGTATGAGTTTGAA  | 256 |
| PBV/Mongoose/KNA/M72/2017       | TAAAGTC----GA-TTGAC-ACAGCTGGCCTTCATTGTACAAGTACGAA   | 293 |
| PBV/Human/CHN/1-CHN-97/1997     | TTGGACA----AGATCGGAAACGA-TTGGCCAACGCTTCTGGATTTTGAA  | 267 |
|                                 | * * * * *                                           |     |

|                                 |                                                     |     |
|---------------------------------|-----------------------------------------------------|-----|
| PBV-like/Mongoose/KNA/M17A/2017 | ATGGACATGAAATCAAAGTCGGTCCACTCTCCGTCCA-AGAACCCTTAC   | 365 |
| PBV/Mongoose/KNA/M17B/2017      | ATGGACTTAGCTAGCAAGTCGGCCCATTATCAGTTCA-GAAACCTTTGC   | 338 |
| PBV/Mongoose/KNA/M33/2017       | GAGGACCTCTCTAAGAAGGTCGGACCAATGTCAGT-CATGAAACCTTTGA  | 363 |
| PBV/Mongoose/KNA/M45/2017       | ATTGACCTCGCGAAGAAGGTCGGACCTATGTCAGT-CATGGCACCCCTTA  | 305 |
| PBV/Mongoose/KNA/M46/2017       | AAAGATCTTGCGACGAAGGTCGGACCAATGTCTGT-GATGAAACCTCTTA  | 311 |
| PBV/Mongoose/KNA/M58/2017       | ATTGACCTCGCGAAGAAGGTCGGACCTATGTCAGT-CATGGCACCCCTTA  | 305 |
| PBV/Mongoose/KNA/M67/2017       | ATTGACCTCGCGAAGAAGGTCGGACCTATGTCAGT-CATGGCACCCCTTA  | 305 |
| PBV/Mongoose/KNA/M72/2017       | ATTGACCTCGCAAGCAAGGTCGGACCTATGTCAGTGC GTAA-GCCTCTCT | 342 |
| PBV/Human/CHN/1-CHN-97/1997     | AATGATCTCGCGAAGAAGGTCGGTCCGTTGTCTATTCA-AAAGCCACTCG  | 316 |

\*\* \*                  \*\* \*\*\*\*\* \*\* \* \*                  \*\* \*

Supplementary material S4 (contd.)

|                                 |                                                      |     |
|---------------------------------|------------------------------------------------------|-----|
| PBV-like/Mongoose/KNA/M17A/2017 | TAAGACGGATTCCCCGACGTAATGGACTATTATAACGAT----CCGAAAGG  | 411 |
| PBV/Mongoose/KNA/M17B/2017      | GCGAGAGGATAACTGATATTGCGCATTACTACGAAGATATTCTCCTATCT   | 388 |
| PBV/Mongoose/KNA/M33/2017       | GTCAGAGAATGACTGATATTCTGTTCTTACTATGATGGTATTCTCCTTCCA  | 413 |
| PBV/Mongoose/KNA/M45/2017       | GTAAACGCATGCCTGATATAGATTCTTACTACGAAGGTATTCTCTCCCCCT  | 355 |
| PBV/Mongoose/KNA/M46/2017       | GCGAACGCATTATGGATATTGATTCTTATTACGACGGTATTCACCAACCA   | 361 |
| PBV/Mongoose/KNA/M58/2017       | GCAAACGCATGTCCTGATATAGATTCTTACTACGAAGGTATTCTCTCCCCCT | 355 |
| PBV/Mongoose/KNA/M67/2017       | GTAAACGCATGTCCTGATATAGATTCTTACTACGAAGGTATTCTCTCCCCCT | 355 |
| PBV/Mongoose/KNA/M72/2017       | CCGAGCGCATGGAAGACATAGACCATTACTATGACGGTATTCTCCTTCCG   | 392 |
| PBV/Human/CHN/1-CHN-97/1997     | CAGAGCGTTTGGATGACATCGAATCTTACTATGAATCTATCTCCTTAGAT   | 366 |
|                                 | * * ** *                                             |     |
| PBV-like/Mongoose/KNA/M17A/2017 | TCAGGA--AGTTAGTCCGCGAGCAATCGCATGCG-TTAAGGAAGAATTTA   | 458 |
| PBV/Mongoose/KNA/M17B/2017      | TCAACACCAATAGATCCTGTTGCCATAA-AGCAGACTATTGGTGAATTCA   | 437 |
| PBV/Mongoose/KNA/M33/2017       | TCAGAACCACCTCAGTGAGAGGGCGATCGCAGCTG-TGATCTCTGAGTGGC  | 462 |
| PBV/Mongoose/KNA/M45/2017       | TCGAAACCACTCAGCGACCGAGCAGTAGCGGCCG-TGATCGCTGAGTGGA   | 404 |
| PBV/Mongoose/KNA/M46/2017       | GTCGCACGAATCAACGATACTGCTCTCCAAGCCG-TAGTATCGGAATTCA   | 410 |
| PBV/Mongoose/KNA/M58/2017       | TCGAAACCACTCAGCGACCGAGCAGTAGCGGCCG-TGATCGCTGAGTGGA   | 404 |
| PBV/Mongoose/KNA/M67/2017       | TCGAAACCACTCAGCGACCGAGCAGTAGCGGCCG-TGATCGCTGAGTGGA   | 404 |
| PBV/Mongoose/KNA/M72/2017       | TCAACATCTGTGAGCGACAGTGCGATAGCGGCTG-TTGTTCATGAGATGA   | 441 |
| PBV/Human/CHN/1-CHN-97/1997     | TCAGAACCCATTAGTAGATCAGCAATAGCAGCTG-TGATAGCTGAATGGG   | 415 |
|                                 | * *                                                  |     |
| PBV-like/Mongoose/KNA/M17A/2017 | AAGCATTAAGGGGTCTCAGGTTGCGTGATGCTGATGCAACTGTGCTGAG    | 508 |
| PBV/Mongoose/KNA/M17B/2017      | ACAAAGCAAGAGGGTTGAGAAGAAGATCACAGGCAAGAACAGTAGAAATG   | 487 |
| PBV/Mongoose/KNA/M33/2017       | GTAGTTTTCGAGGACTACGACCCCGCAATCAAGCGGATACCCTTTTCGCTC  | 512 |
| PBV/Mongoose/KNA/M45/2017       | GCAGGGTCCGTGGCCTGCACGTGCGTGATCAGAGGAAAACAGTTGAGTTG   | 454 |
| PBV/Mongoose/KNA/M46/2017       | GTCCAATCAGGGGACTGCATCTGCGTAGTCAGCAACGTACAGTCGACTTA   | 460 |
| PBV/Mongoose/KNA/M58/2017       | GCAGGGTCCGTGGCCTGCACGTGCGTGATCAGAGGAAAACAGTTGAGTTG   | 454 |
| PBV/Mongoose/KNA/M67/2017       | GCAGGGTCCGTGGCCTGCACGTGCGTGATCAGAGGAAAACAGTTGAGTTG   | 454 |
| PBV/Mongoose/KNA/M72/2017       | GCAGGTTGCGCGGCCCTGCGACTTCGCAGCCAAGATAGGACAGTAGAGTTG  | 491 |
| PBV/Human/CHN/1-CHN-97/1997     | GGGATGCGCGCGGCATCCAATTAAGAGGCCAACGCAAAACAGTGGAAT     | 465 |
|                                 | * ** *                                               |     |
| PBV-like/Mongoose/KNA/M17A/2017 | ATGCGCCGCAATACTAATTTCGGGCGCTCCTTATTTACTCGTCGGTCACG   | 558 |
| PBV/Mongoose/KNA/M17B/2017      | ATGAAGAAATCCACCAATTTCAGGTAATCCGTTCTTTACAAAACGCAGAAA  | 537 |
| PBV/Mongoose/KNA/M33/2017       | ATGAAGCTGAGCACGAATTCTGGCTCGCCGTACTTTACCAAGAGGCGTAA   | 562 |
| PBV/Mongoose/KNA/M45/2017       | ATGAAGAAATCAACCAATTCCGGCTCTCCGTTCTTACTAGACGTAAGCG    | 504 |
| PBV/Mongoose/KNA/M46/2017       | ATGAAGAAGTCCACTAACTCTGGGTACCATACTTCACCAAGAGGCGTAG    | 510 |
| PBV/Mongoose/KNA/M58/2017       | ATGAAGAAGTCAACCAATTCCGGCTCTCCGTTCTTACTAGACGTAAGCG    | 504 |
| PBV/Mongoose/KNA/M67/2017       | ATGAAGAAGTCAACCAATTCCGGCTCTCCGTTCTTACTAGACGTAAGCG    | 504 |
| PBV/Mongoose/KNA/M72/2017       | ATGAAGAAGAGCACCAACTCCGGGAGCCCGTACTTCTCAAAGCGTCGATT   | 541 |
| PBV/Human/CHN/1-CHN-97/1997     | ATGAAGAAATCTACTAACTCAGGTTTCGCCATTCTTTACTAAACGTAGAGC  | 515 |
|                                 | *** ** *                                             |     |
| PBV-like/Mongoose/KNA/M17A/2017 | TGTCG-AGTCGGAA---TCCC---TAGAATTGG-----C-----         | 585 |
| PBV/Mongoose/KNA/M17B/2017      | TGTAGTACTGGATACATTTCCATGTGGTGTGATTATACACCCAATCCTG    | 587 |
| PBV/Mongoose/KNA/M33/2017       | TGCCATAGACATCACTGTGCCATGTAGTGTAGAT-----TCAACAGTG     | 606 |
| PBV/Mongoose/KNA/M45/2017       | TGTAGTAGACGAAACAATTCCCGCCGAAGTAG-----CACGTCGAG       | 545 |
| PBV/Mongoose/KNA/M46/2017       | AGTTGTAGAGAAAACCGTCCCATTGTCG-GTCAAA-----TGGGCAACT    | 552 |
| PBV/Mongoose/KNA/M58/2017       | TGTAGTAGACGAAACAATTCCCGCCGAAGTAG-----CACGTCGAG       | 545 |
| PBV/Mongoose/KNA/M67/2017       | TGTAGTAGACGAAACAATTCCCGCCGAAGTAG-----CACGTCGAG       | 545 |
| PBV/Mongoose/KNA/M72/2017       | AGTCACAGAGCGAACCGTACCGTGCGAAGTCTATC-----CGTATCGCG    | 585 |
| PBV/Human/CHN/1-CHN-97/1997     | AGTTGTTGACAAAACATATACC-CGCGAGGTTAGAT---TATCTAGGAGTG  | 561 |
|                                 | * * *                                                |     |

Supplementary material S4 (contd.)

|                                 |                                                    |     |
|---------------------------------|----------------------------------------------------|-----|
| PBV-like/Mongoose/KNA/M17A/2017 | -----TAAG-----ACTA-----GATCGTTA                    | 601 |
| PBV/Mongoose/KNA/M17B/2017      | TATATTATTTGCAGGATGCGTAT-CAGATGTTACCCAACAATAACGATTT | 636 |
| PBV/Mongoose/KNA/M33/2017       | -----ATGAAGTA---ATCCAGCAACTAGGCT-C--TGACTTGTG      | 640 |
| PBV/Mongoose/KNA/M45/2017       | -----GCGAGGTCGTCATGCAAACACTACCAG-C--TGGCATATG      | 582 |
| PBV/Mongoose/KNA/M46/2017       | -----ACAATTTCTCGAT---GGTGGTGAGAA-----AACCTATG      | 584 |
| PBV/Mongoose/KNA/M58/2017       | -----GCGAGGTCGTCATGCAAACACTACCAG-C--TGGCATATG      | 582 |
| PBV/Mongoose/KNA/M67/2017       | -----GCGAGGTCGTCATGCAAACACTACCAG-C--TGGCATATG      | 582 |
| PBV/Mongoose/KNA/M72/2017       | -----ATGAGATC--CAC-CAGTCACTGAAAGAC--TCGCA-GTG      | 619 |
| PBV/Human/CHN/1-CHN-97/1997     | -----CAGACT----AAGCAGTTCCTAAATAATTCGGATTGGTA       | 596 |

\* \* \*

|                                 |                                                        |     |
|---------------------------------|--------------------------------------------------------|-----|
| PBV-like/Mongoose/KNA/M17A/2017 | GCATATC-CAGCAGTTTTtagggtggagaggacaagaagggtgggtatttgata | 650 |
| PBV/Mongoose/KNA/M17B/2017      | TAAAGCCTGTGCCGTTATTGGTTGGAGAGGACAGGAAGGTGGACCCGAAG     | 686 |
| PBV/Mongoose/KNA/M33/2017       | GAATGCCGTGTGCTGTATTAGGGTGGCGTGGCCAAGAGGGTGGCCCTAACA    | 690 |
| PBV/Mongoose/KNA/M45/2017       | GGATGCGTGTGCTGTTCTAGGTTGGAGAGGTCAGGAAGGCGGTCCCTCCA     | 632 |
| PBV/Mongoose/KNA/M46/2017       | --ATGTTGCAGCTATTCTTGGATGGAGGGGCCAGGAGGGCGGCCCTGCGA     | 632 |
| PBV/Mongoose/KNA/M58/2017       | GGATGCGTGTGCTGTTCTAGGTTGGAGAGGTCAGGAAGGCGGTCCCTCCA     | 632 |
| PBV/Mongoose/KNA/M67/2017       | GGATGCGTGTGCTGTTCTAGGTTGGAGAGGTCAGGAAGGCAGTCCCTCCA     | 632 |
| PBV/Mongoose/KNA/M72/2017       | GAACGCTGCCGCCGTTTtagggtggcgagggcaagaaggcggtcctaaag     | 669 |
| PBV/Human/CHN/1-CHN-97/1997     | TAGTGC---AGCAGTATTAGGATGGAGAGGACAAGAGGGCGGTCCAACAG     | 643 |

\* \* \* \* \*

|                                 |                                                     |     |
|---------------------------------|-----------------------------------------------------|-----|
| PBV-like/Mongoose/KNA/M17A/2017 | CTGATAACGTGAAACAACGCGTTGTTTGAATGTTTCCTTTCCAAACGAAC  | 700 |
| PBV/Mongoose/KNA/M17B/2017      | ATGAGGATGTTAAACAGAGAGTGGTTTGGATGTTTCCATTTCGCTGTTAAT | 736 |
| PBV/Mongoose/KNA/M33/2017       | AGAAGGATGTAAAGCAGAGGGTTGTTTGGATGTTTCCCTTTGCTGTTAAT  | 740 |
| PBV/Mongoose/KNA/M45/2017       | AGGACGATACGAAACAGCGAGTCGTTTGGATGTTTCCGATGGCTGTTAAT  | 682 |
| PBV/Mongoose/KNA/M46/2017       | CCGGAGATGTTAAACAAAGGGTTGTATGGATGTTTCCCTTTGCAATTAAT  | 682 |
| PBV/Mongoose/KNA/M58/2017       | AGGACGATACGAAACAGCGAGTCGTTTGGATGTTTCCGATGGCTGTTAAT  | 682 |
| PBV/Mongoose/KNA/M67/2017       | AGGACGATACGAAACAGCGAGTCGTTTGGATGTTTCCGATGGCTGTTAAT  | 682 |
| PBV/Mongoose/KNA/M72/2017       | CAAGTGATGTTAAACAGCGTGTGGTTTGGATGTTTCCCTACGCCGTTAAT  | 719 |
| PBV/Human/CHN/1-CHN-97/1997     | ATGAAGAGCTTAAACAAAGGGTGGTGTGGATGTTTCCCTTTGGTGTTAAC  | 693 |

\* \* \* \* \*

|                                 |                                                     |     |
|---------------------------------|-----------------------------------------------------|-----|
| PBV-like/Mongoose/KNA/M17A/2017 | ATCGCGGAATTACAGTTCTACCAGCCCATGATCCGGGCGATTCAAGCACA  | 750 |
| PBV/Mongoose/KNA/M17B/2017      | ATCGAAGAACTCACAGTCTATCAACCACTGATTGAAACATTTTCAGAGATT | 786 |
| PBV/Mongoose/KNA/M33/2017       | ATCAGAGAACTTCAGGTATATCAACCCCTTAATTGAAGTTGCACAAAGGGC | 790 |
| PBV/Mongoose/KNA/M45/2017       | GTACGAGAACTCCAAGTGTATCAGCCCCTCATCGAAGCCGCGCAAAAGTT  | 732 |
| PBV/Mongoose/KNA/M46/2017       | ATTCTCGAGCTCCAAGTCTACCAACCACTCATTGAATCGGCGCAGAGATT  | 732 |
| PBV/Mongoose/KNA/M58/2017       | GTACGAGAACTCCAAGTGTATCAGCCCCTCATCGAAGCCGCGCAAAAGTT  | 732 |
| PBV/Mongoose/KNA/M67/2017       | GTACGAGAACTCCAAGTGTATCAGCCCCTCATCGAAGCCGCGCAAAAGTT  | 732 |
| PBV/Mongoose/KNA/M72/2017       | ATCGCAGAATTGCAGCTGTATCAACCATTTCATTGAGGCCGCACAAAGGCA | 769 |
| PBV/Human/CHN/1-CHN-97/1997     | GTGAAGGAACCTCAATTCTACCAACCAGCAATCGAAATCGCACAGAAG--  | 741 |

\* \* \* \* \*

|                                 |                                                     |     |
|---------------------------------|-----------------------------------------------------|-----|
| PBV-like/Mongoose/KNA/M17A/2017 | TAAAC--TCATCCCTGCCTATTTGGATCATAACA-GCAGTGGATGCTCGGA | 797 |
| PBV/Mongoose/KNA/M17B/2017      | CAATC--TGGTTCCAGCTTGGGTGAG-TATGGAAGTGTGATATGGAAG    | 833 |
| PBV/Mongoose/KNA/M33/2017       | AAACT--TGGTTCCCTGCATGGGTTAG-CATGGAATCGGTTGATAAGGAAA | 837 |
| PBV/Mongoose/KNA/M45/2017       | CGATG--TGGTCCCTGCGTGGGTTAG-CATGGATCAGGTTGATTTGGCCG  | 779 |
| PBV/Mongoose/KNA/M46/2017       | CAATT--TGGTTCCATCGTGGGTTC-GATGGAATCCGTGGATCAACGTA   | 779 |
| PBV/Mongoose/KNA/M58/2017       | CGATG--TGGTCCCTGCGTGGGTTAG-CATGGATCAGGTTGATTTGGCCG  | 779 |
| PBV/Mongoose/KNA/M67/2017       | CGATG--TGGTCCCTGCGTGGGTTAG-CATGGATCAGGTTGATTTGGCCG  | 779 |
| PBV/Mongoose/KNA/M72/2017       | CAATG--TCGTCCCAGCTTGGGTGG-CTTCGACGAGGTTGATAAACGCA   | 816 |
| PBV/Human/CHN/1-CHN-97/1997     | CGATGGATAACTCCTGCATGGATTGG-CATGGAGGCAGTAGATCAGCGAA  | 790 |

\* \* \* \* \*

Supplementary material S4 (contd.)

|                                 |                                                     |      |
|---------------------------------|-----------------------------------------------------|------|
| PBV-like/Mongoose/KNA/M17A/2017 | TAACGAATCTATTTGACACCAAACCTACGGGTGATCTTGTAGTTGAAACC  | 847  |
| PBV/Mongoose/KNA/M17B/2017      | TCACTCGCTTATTTGATACTAAGAATAGTGACGACCTCGTTGTGTGCACG  | 883  |
| PBV/Mongoose/KNA/M33/2017       | TTACACGATTATTTGATACTAAGAGTGATAATGACCTGATAGTCTGTACC  | 887  |
| PBV/Mongoose/KNA/M45/2017       | TGACACGCCTGTTTCGATACTAAGGGCGCGAACGACCTCGTAGTATGCACC | 829  |
| PBV/Mongoose/KNA/M46/2017       | TTACTCGTATGTTTGATACCAAGGCAGACGGTGATTTGGTAGTATGCACC  | 829  |
| PBV/Mongoose/KNA/M58/2017       | TCACGCGCCTGTTTCGATACTAAGGGCGCGAACGACCTCGTAGTATGCACC | 829  |
| PBV/Mongoose/KNA/M67/2017       | TGACGCGCCTGTTTCGATACTAAGGGCGCGAACGACCTCGTAGTATGCACC | 829  |
| PBV/Mongoose/KNA/M72/2017       | TTACAGCCATGTTTCGACACAAAGGCTGCTAATGATCTAGTCGTATGTACC | 866  |
| PBV/Human/CHN/1-CHN-97/1997     | TCACTAAGCTGTTTCGATACTAAGGCTAAGTCAGAGTTGGTAATCTGTACA | 840  |
|                                 | * * * * * * * * * *                                 |      |
| PBV-like/Mongoose/KNA/M17A/2017 | GATTTTACCAAGTTCGACCAGTCGTTCTGAACACCAT-TACAACATGTAG  | 896  |
| PBV/Mongoose/KNA/M17B/2017      | GACTTCACAAAATTCGACCAG-CATTTCAATGTAGATCTACAGAATGCAG  | 932  |
| PBV/Mongoose/KNA/M33/2017       | GACTTCTCAAAATTCGACCAG-CACTTTGGTCCTGATATGCAGGATGCTG  | 936  |
| PBV/Mongoose/KNA/M45/2017       | GATTTTACCAAGTTCGACCAG-CACTTCAATCATTCACTTCAAGTTGCTG  | 878  |
| PBV/Mongoose/KNA/M46/2017       | GATTTTGAAGTTCGACCAG-CACTTCAACTCCGCTCTGCAACTAGCGG    | 878  |
| PBV/Mongoose/KNA/M58/2017       | GATTTTACCAAGTTCGACCAG-CACTTCAATCATTCACTTCAAGTTGCTG  | 878  |
| PBV/Mongoose/KNA/M67/2017       | GATTTTACCAAGTTCGACCAG-CACTTCAATCATTCACTTCAAGTTGCTG  | 878  |
| PBV/Mongoose/KNA/M72/2017       | GACTTCAGCAAGTTCGACCAG-CATTTTAACGCCAAATTGCAAGATGCTG  | 915  |
| PBV/Human/CHN/1-CHN-97/1997     | GACTTCAGCAAGTTCGACCAG-CATTTTAACAAGGATATGCAGGATGCAG  | 889  |
|                                 | ** ** * * * * * *                                   |      |
| PBV-like/Mongoose/KNA/M17A/2017 | CGCGTGCTGT-----GTACG---CCGACTGAGGTCCACAAC-----TT    | 931  |
| PBV/Mongoose/KNA/M17B/2017      | CGAAAACCAT----ACTGCA--ATGGATCATGTCACGCGAAAGAAATGTA  | 976  |
| PBV/Mongoose/KNA/M33/2017       | CAAGAGCCAT----ATTGCA--GAAAATCCTGTCACC--AC---AAGCTT  | 975  |
| PBV/Mongoose/KNA/M45/2017       | CCCTATCCAT----TCTGGA--AGCAATCTTTACACCCGACCGGGAGTGG  | 922  |
| PBV/Mongoose/KNA/M46/2017       | CAGAACAAAT----CCTACG--CAGGATACTCGCTCCGGATGCGGACAGT  | 922  |
| PBV/Mongoose/KNA/M58/2017       | CCCTATCCAT----TCTGGA--AGCAATCTTTACACCCGACCGGGAGTGG  | 922  |
| PBV/Mongoose/KNA/M67/2017       | CCCTATCCAT----TCTGGA--AGCAATCTTTACACCCGACCGGGAGTGG  | 922  |
| PBV/Mongoose/KNA/M72/2017       | CTCTTCAAGT----GCTTCG--AGCAATAGTAACACCCGGCGTGACGTCC  | 959  |
| PBV/Human/CHN/1-CHN-97/1997     | CTAGGACCATTATCGCTGCATTACTGAATGGATCATCTGA----AAGC--  | 933  |
|                                 | * * * *                                             |      |
| PBV-like/Mongoose/KNA/M17A/2017 | GATAAGTGAATTAGAGAAGTATTCCCGGTAAAATATAATATTTCCCATGG- | 980  |
| PBV/Mongoose/KNA/M17B/2017      | GATGACTGGTTTGAAAACGTGTTTCGGAATCAAATATATGATTCCCTTA-- | 1024 |
| PBV/Mongoose/KNA/M33/2017       | CA-GACTGGTTGAGAGAAGTATTTCCTTAAAGTATATGATCCCGTTGGC   | 1024 |
| PBV/Mongoose/KNA/M45/2017       | CAGGAATGGTCCCGTGAAATCTATCCCTGAAATATATGATTCCCTTTAGC  | 972  |
| PBV/Mongoose/KNA/M46/2017       | CTAAACTGGTTACGACAAATTTTCCCATTAAGTTCAATATCCCATTAGC   | 972  |
| PBV/Mongoose/KNA/M58/2017       | CAGGAATGGTCCCGTGAAATCTATTCCTGAAATATATGATTCCCTTTAGC  | 972  |
| PBV/Mongoose/KNA/M67/2017       | CAGGAATGGTCCCGTGAAATCTATTCCTGAAATATATGATTCCCTTTAGC  | 972  |
| PBV/Mongoose/KNA/M72/2017       | AAAGAATGGTTCGACAAAGTGTACCCCATCAAGTACATGATACCTTTAGC  | 1009 |
| PBV/Human/CHN/1-CHN-97/1997     | CGTGATTGGTTGGACAACGTTTTTCCAGTGAAGTATGCGATACCTCTAGC  | 983  |
|                                 | * * * * * * * *                                     |      |
| PBV-like/Mongoose/KNA/M17A/2017 | -TATTAT-CGAATAATTTGATTTT-----CACCGGACCACACGG        | 1017 |
| PBV/Mongoose/KNA/M17B/2017      | CTGTGGGAAGCACAAGCTGATATTGTATCAGTTTTCCACGGATTTACCG   | 1074 |
| PBV/Mongoose/KNA/M33/2017       | TATCCAGGATGATAAAATACTTTA-----TGGACGTCATGG           | 1060 |
| PBV/Mongoose/KNA/M45/2017       | TTATGACTACGGTAAGCTGAGAAC-----AGGGCCGCACGG           | 1008 |
| PBV/Mongoose/KNA/M46/2017       | TGTTGATATGAACACCGTGTTTAC-----AGGTGCGCACGG           | 1008 |
| PBV/Mongoose/KNA/M58/2017       | TTATGACTACGGTAAGCTGAGAAC-----AGGGCCGCACGG           | 1008 |
| PBV/Mongoose/KNA/M67/2017       | TTATGACTACGGTAAGCTGAGAAC-----AGGGCCGCACGG           | 1008 |
| PBV/Mongoose/KNA/M72/2017       | ATATGATGTGGGTAGGGTTAGATT-----TGGGAAACATGG           | 1045 |
| PBV/Human/CHN/1-CHN-97/1997     | TATGGATATGGGAGTAGTAAAAAC-----TGGTTTTACCG            | 1019 |
|                                 | * * * * *                                           |      |

Supplementary material S4 (contd.)

|                                 |                                                      |      |
|---------------------------------|------------------------------------------------------|------|
| PBV-like/Mongoose/KNA/M17A/2017 | CATGGCGTCGGGATCAGGGGGTACTAATGCTGATGAGTCGATTGCACACA   | 1067 |
| PBV/Mongoose/KNA/M17B/2017      | AATGGCTTCTGGTTCGGGAGGTACGAACGTAGATGAGACTTTAGCTCATC   | 1124 |
| PBV/Mongoose/KNA/M33/2017       | CATGGGTTCAGGCAGTGGAGGAACAAACGCCGACGAAACGTTAGCTCACC   | 1110 |
| PBV/Mongoose/KNA/M45/2017       | AATGGGCTCAGGTTCTGGTGGAACCAATGCTGATGAGACTTTAGCTCATC   | 1058 |
| PBV/Mongoose/KNA/M46/2017       | TATGGGAAGTGGTTCGGGGGTACCAATGCTGACGAAACGTTAGCACACA    | 1058 |
| PBV/Mongoose/KNA/M58/2017       | AATGGGCTCAGGTTCTGGTGGAACCAATGCTGATGAGACTTTAGCTCATC   | 1058 |
| PBV/Mongoose/KNA/M67/2017       | AATGGGCTCAGGTTCTGGTGGAACCAATGCTGATGAGACTTTAGCTCATC   | 1058 |
| PBV/Mongoose/KNA/M72/2017       | AATGGGCTCTGGTTCGGGAGGAACGAACGTGTGACGAAACTTTAGCCCATC  | 1095 |
| PBV/Human/CHN/1-CHN-97/1997     | TATGGGTAGTGGTTCAGGTGGAACCAACTTCGATGAAACCCTGACACATC   | 1069 |
|                                 | **** ** ** ** **                                     |      |
| PBV-like/Mongoose/KNA/M17A/2017 | GGGCGTTACAGCATGAAGCTGC--TTTAGCGTCGGGTCAGACTCTCCACC   | 1115 |
| PBV/Mongoose/KNA/M17B/2017      | GAGCCCTTCAACGTGAGGCGGC-CATAAAAAGTAAACAAATAT-TAAACC   | 1172 |
| PBV/Mongoose/KNA/M33/2017       | GTGCCCTCCAATATGAAGCTGCCAG-CAAATGGGTGCCAGAT-TAAACC    | 1158 |
| PBV/Mongoose/KNA/M45/2017       | GAGCTCTGCAATATGAGGCCGC-CATTCGTGCGAAGACTCGTT-TAAACC   | 1106 |
| PBV/Mongoose/KNA/M46/2017       | GAGCTCTTCAATATGAGGCCGC-CATCAAAAACAACCTCCCGAT-TAAACC  | 1106 |
| PBV/Mongoose/KNA/M58/2017       | GAGCTCTGCAATATGAGGCCGC-CATTCGTGCGAAGACTCGTT-TAAACC   | 1106 |
| PBV/Mongoose/KNA/M67/2017       | GAGCTCTGCAATATGAGGCCGC-CATTCGTGCGAAGACTCGTT-TAAACC   | 1106 |
| PBV/Mongoose/KNA/M72/2017       | GTGCACTGCAATATGAGGCAGCTCAAACCTAGCGGGGTAAAGCT-TAA-CC  | 1143 |
| PBV/Human/CHN/1-CHN-97/1997     | GAGCTTTACAGTATGAAGCAGCCCAG-AAAGCTAAATCGGTGC-TCAATC   | 1117 |
|                                 | * ** * ** *** ** *                                   |      |
| PBV-like/Mongoose/KNA/M17A/2017 | CATCCTCAATGGCATATGGGGACGATGGTATCTTAACGTTCAAGGGTATC   | 1165 |
| PBV/Mongoose/KNA/M17B/2017      | CTCATTTCAATGTGTCTTGGCGATGATGGGATACTAAGTTATCCCGGAATA  | 1222 |
| PBV/Mongoose/KNA/M33/2017       | CAAGTTCAATGTGTTTAGGCGATGATGGAATCTTGAGCTATCCAGGCATC   | 1208 |
| PBV/Mongoose/KNA/M45/2017       | CGAATTCACAGTGTCTTGGCGATGATGGGATACTAAGTTATCCTGGAATC   | 1156 |
| PBV/Mongoose/KNA/M46/2017       | CTAATTCACAGTGTCTTGGGCGATGATGGTGTATTAACATACCCAGGCATT  | 1156 |
| PBV/Mongoose/KNA/M58/2017       | CGAATTCACAGTGTCTTGGGCGATGACGGGATACTAAGTTATCCTGGAATC  | 1156 |
| PBV/Mongoose/KNA/M67/2017       | CGAATTCACAGTGTCTTGGGCGATGACGGGATACTAAGTTATCCTGGAATC  | 1156 |
| PBV/Mongoose/KNA/M72/2017       | CAAATTCACAGTGTCTTGGGCGATGACGGGGTGTAAACCTACCCTGGGCATC | 1193 |
| PBV/Human/CHN/1-CHN-97/1997     | CAAATTCGCAGTGTCTAGGTGATGACGGCATTCTTTCCTATCCTGGAATT   | 1167 |
|                                 | * ** * ** ** ** *                                    |      |
| PBV-like/Mongoose/KNA/M17A/2017 | ACCGTTGATAAAGTGGTAGCACAAATATACTAAGCATGGAGTGACCATGAA  | 1215 |
| PBV/Mongoose/KNA/M17B/2017      | ACAGTGAATGAAGTAGTGGATGCATACCAGTCTCACGGTCAAGAGTGCAA   | 1272 |
| PBV/Mongoose/KNA/M33/2017       | ACAGTGGACGATGTAGTTAAAGCGTATAGTAGGCACGGGCTTGAAATGAA   | 1258 |
| PBV/Mongoose/KNA/M45/2017       | ACTGTGGAAGATGTAGTGAATCGTATACTGAACATGGTCTCGAGATGAA    | 1206 |
| PBV/Mongoose/KNA/M46/2017       | ACTGCGGAGGATGTAATGCAATCGTACAAAAGACATGGCCTCAAATGAA    | 1206 |
| PBV/Mongoose/KNA/M58/2017       | ACTGTGGAAGATGTAGTGAATCGTATACTGAACATGGTCTCGAGATGAA    | 1206 |
| PBV/Mongoose/KNA/M67/2017       | ACTGTGGAAGATGTAGTGAATCGTATACTGAACATGGTCTCGAGATGAA    | 1206 |
| PBV/Mongoose/KNA/M72/2017       | ACTGTGGAGGATGTAGTCAAAGCGTACACGTACATGGGGTTGAGATGAA    | 1243 |
| PBV/Human/CHN/1-CHN-97/1997     | ACTGTGGAGGATGTAACACGTTCTGATTTCTGCGCATGGTCAGGAAATGAA  | 1217 |
|                                 | ** * * ** ** ** **                                   |      |
| PBV-like/Mongoose/KNA/M17A/2017 | CGAGAGT--AAGCAGGGAGCAAGCACTACCGAGTGCGTATTCCTACGCCG   | 1263 |
| PBV/Mongoose/KNA/M17B/2017      | TTTAAGC--AAACAGTATGCATCAACCCAAGATTGCGTATATCTCAGAAG   | 1320 |
| PBV/Mongoose/KNA/M33/2017       | TCAGGAC--AAGCAATACGCTTCAACCCAAGATTGCGTGTACTTGAGAAG   | 1306 |
| PBV/Mongoose/KNA/M45/2017       | T--GAATCGAAGCAGTACGCGAGCACCCATGACTGCACATACTTAAGAAG   | 1254 |
| PBV/Mongoose/KNA/M46/2017       | CGCTAGT--AAACAGTACGAGAGCACACAGGACTGCACATACTTGCGAAG   | 1254 |
| PBV/Mongoose/KNA/M58/2017       | T--GAATCGAAGCAGTACGCGAGCACCCATGACTGCACATACTTAAGAAG   | 1254 |
| PBV/Mongoose/KNA/M67/2017       | T--GAATCGAAGCAGTACGCGAGCACCCATGACTGCACATACTTAAGAAG   | 1254 |
| PBV/Mongoose/KNA/M72/2017       | TCTGGGT--AAACAGTACGCCCTCGACTCAAGATTGCATATATCTTAGGCG  | 1291 |
| PBV/Human/CHN/1-CHN-97/1997     | TATTGAT--AAGCAGTATGCGAGTGCACATGACTGCACATATCTTCGTCG   | 1265 |
|                                 | ** ** * * ** ** *                                    |      |

Supplementary material S4 (contd.)

|                                 |                                                      |      |
|---------------------------------|------------------------------------------------------|------|
| PBV-like/Mongoose/KNA/M17A/2017 | TTGACACTCTATGTCCTATCGTAAGAACGGGATTATG-GTAGGTGTTTAT   | 1312 |
| PBV/Mongoose/KNA/M17B/2017      | ATGGCATCATAAAGATTATCGGGATAATGGGGT-ATGCGTCGGGGTCTAC   | 1369 |
| PBV/Mongoose/KNA/M33/2017       | GTGGCACCATAAAGATTACCGAATACGAGGAGT-ATGCGCAGGAGTGTAC   | 1355 |
| PBV/Mongoose/KNA/M45/2017       | GTGGTATCACCGCGAGTATAGGATAAAGGGTGT-ATGTGCAGGAGTATAC   | 1303 |
| PBV/Mongoose/KNA/M46/2017       | ATGGCATCATAAAGATTATCGCATGGACGGTAT-GTGTGTAGGCGTATAC   | 1303 |
| PBV/Mongoose/KNA/M58/2017       | GTGGTATCACCGCGAGTATAGGATAAAGGGTGT-ATGTGCAGGAGTATAC   | 1303 |
| PBV/Mongoose/KNA/M67/2017       | GTGGTACCACCGCGAGTATAGGATAAAGGGTGT-ATGTGCAGGAGTATAC   | 1303 |
| PBV/Mongoose/KNA/M72/2017       | GTGGCACCACAAAGACTACCGCGTGGACGGGGT-ATGTGCAGGGGTATAC   | 1340 |
| PBV/Human/CHN/1-CHN-97/1997     | GTGGCACCACGACGACTACAGAGTAGACGGTGT-ATGTGTAGGTGTTTAT   | 1314 |
|                                 | ** * ** *                                            |      |
| PBV-like/Mongoose/KNA/M17A/2017 | TCGACGTTCCGGGCTTTAGGACGTTTGATGGGTCAAGAACGGTACTATGA   | 1362 |
| PBV/Mongoose/KNA/M17B/2017      | TCGACCTGTGAGCGCTGGGTAGATTGAGATACCTCGAAAGAT-TTATGG    | 1418 |
| PBV/Mongoose/KNA/M33/2017       | GCTACTACCCGGGCTTTGGGTAGGTTAAGGTACCTCGAGCGAT-TTATGG   | 1404 |
| PBV/Mongoose/KNA/M45/2017       | TCAACTAACCGGGCCTTAGGTAGATTGAGATACTTAGAGCGCTACTATGA   | 1353 |
| PBV/Mongoose/KNA/M46/2017       | TCCACCTGCCGGGCTTTAGGTAGGTTATGCGAGCAAGAGAGATATTACGA   | 1353 |
| PBV/Mongoose/KNA/M58/2017       | TCAACTAACCGGGCCTTAGGTAGATTGAGATACTTAGAACGCTACTATGA   | 1353 |
| PBV/Mongoose/KNA/M67/2017       | TCAACTAACCGGGCCTTAGGTAGATTGAGATACTTAGAACGCTACTATGA   | 1353 |
| PBV/Mongoose/KNA/M72/2017       | AGCACCTGTGCGGCTTTAGGCAGGTTGCGGTATCTCGAACGCTATCAGAA   | 1390 |
| PBV/Human/CHN/1-CHN-97/1997     | GCAACCTACAGAGCGTTAGGTAGGCTGTGTGAACAGGAACGCTATTATGA   | 1364 |
|                                 | ** * ** * ** *                                       |      |
| PBV-like/Mongoose/KNA/M17A/2017 | -CCCTAAACAATGAGGACCAGAGATGGTTATAATGAGGGCGTTGTCGATA   | 1411 |
| PBV/Mongoose/KNA/M17B/2017      | ATCCAGAGTATTGGAGCCCGCAGATGGTAGCTTTACGCCAATTATCAATA   | 1468 |
| PBV/Mongoose/KNA/M33/2017       | ACCCTGACAAC TGGGGACCAAAGATGGTTGCTCTACGACAAC TATCAATC | 1454 |
| PBV/Mongoose/KNA/M45/2017       | -CCCAGAGGTGTGGGGTCCAAAGATGGTTGCCCTCAGACAAC TATCTATA  | 1402 |
| PBV/Mongoose/KNA/M46/2017       | -TCCGGAATATGGTCAAAAGAGATGGTTGCGCTGCGTCAAC TATCTATA   | 1402 |
| PBV/Mongoose/KNA/M58/2017       | -CCCAGAGGTGTGGGGTCCAAAGATGGTTGCCCTCAGACAAC TATCTATA  | 1402 |
| PBV/Mongoose/KNA/M67/2017       | -CCCAGAGGTGTGGGGTCCAAAGATGGTTGCCCTCAGACAAC TATCTATA  | 1402 |
| PBV/Mongoose/KNA/M72/2017       | TCCCAAATAT-TGGGATGCAAAGGCTGTAGCTCTACGTCAGCTAAGCATA   | 1439 |
| PBV/Human/CHN/1-CHN-97/1997     | -TCCAGAAGTATGGGGGCTAAGATGGTAGCTCTACGGCAGCTTTCAATT    | 1413 |
|                                 | ** * ** ** *                                         |      |
| PBV-like/Mongoose/KNA/M17A/2017 | CTAGAAAATTGCAACCAACATCCTCTCTTCGAAGAGTTTATTGAATTTGT   | 1461 |
| PBV/Mongoose/KNA/M17B/2017      | ATTGAGAATTGTAAGTACCATCCTCTGCGTGACGAGTTTGCGGAGTTTTG   | 1518 |
| PBV/Mongoose/KNA/M33/2017       | ATTGAGAATGTGAAGTACCATCCAATGAGGGCTGAATTTCGTAGAATTTTG  | 1504 |
| PBV/Mongoose/KNA/M45/2017       | TTAGAGAATGTGAAGAACCATCCTCTACGTGATCAATTTGCTCAGTTTTG   | 1452 |
| PBV/Mongoose/KNA/M46/2017       | ATGGAGAATGTGAAGTATCACCCATTACGTGCCGAATTCGCAGACTTTTG   | 1452 |
| PBV/Mongoose/KNA/M58/2017       | TTAGAGAATGTGAAGAACCATCCTCTACGTGATCAATTTGCTCAGTTTTG   | 1452 |
| PBV/Mongoose/KNA/M67/2017       | TTAGAGAATGTGAAGAACCATCCTCTACGTGATCAATTTGCTCAGTTTTG   | 1452 |
| PBV/Mongoose/KNA/M72/2017       | CTTGAGAATGTGAAGTACCATCCTCTCAAGGAACAGTTTGTGGAATTTTG   | 1489 |
| PBV/Human/CHN/1-CHN-97/1997     | ATTGAGAACTGTAAGTACCATCCTCTCCGTGAGGAGTTTCGTTAACTTCTG  | 1463 |
|                                 | * ** ** ** * ** *                                    |      |
| PBV-like/Mongoose/KNA/M17A/2017 | CATCAAAGGGGATAAGTACGGATTGGGTACTAAACTCCCAGGCTTTTTTG   | 1511 |
| PBV/Mongoose/KNA/M17B/2017      | CATGAAGAGGGATAAATATCGATTGGGTATTGATATCCCAGGATTCTTAG   | 1568 |
| PBV/Mongoose/KNA/M33/2017       | CATGAAAAGGGATAAATATAGACTCGGACTAGATATCCCAGGCTTTCTTG   | 1554 |
| PBV/Mongoose/KNA/M45/2017       | CATGAAAAGGGATAAATATCGCCTTGGTATTGATATCCCAGGTTTCCTAG   | 1502 |
| PBV/Mongoose/KNA/M46/2017       | CATGAAAAGGGATATGTATAGGCTAGGGTTAGATATCCCAGGATTCTTAG   | 1502 |
| PBV/Mongoose/KNA/M58/2017       | CATGAAAAGGGATAAATATCGCCTTGGTATTGATATCCCAGGTTTCCTAG   | 1502 |
| PBV/Mongoose/KNA/M67/2017       | CATGAAAAGGGATAAATATCGCCTTGGTATCGATATCCCAGGTTTCCTAG   | 1502 |
| PBV/Mongoose/KNA/M72/2017       | CATGGTAAGGGATAGATATCGATTAGGACTCGATATTCCCAATTTTCTAG   | 1539 |
| PBV/Human/CHN/1-CHN-97/1997     | CATGAAAAGGGGATAAATACAGACTCGGACTGGACATTCCAGGTTTCCTTG  | 1513 |
|                                 | *** ***** ** * * ** * * ** ** * *                    |      |

Supplementary material S4 (contd.)

|                                 |                                                                                                        |      |
|---------------------------------|--------------------------------------------------------------------------------------------------------|------|
| PBV-like/Mongoose/KNA/M17A/2017 | ATAAT-TTACAGGCAATG----TACGCCAAAGCCAGAGATGTGATGCCCG                                                     | 1556 |
| PBV/Mongoose/KNA/M17B/2017      | ATAAAATCGCGACTTATG---CTAAA--GAATCTATCGATCACATGCCAG                                                     | 1613 |
| PBV/Mongoose/KNA/M33/2017       | ACGGAATAGAATCTGAAG---CTAAG--AAAGCTATCGATCTAATGCCAG                                                     | 1599 |
| PBV/Mongoose/KNA/M45/2017       | ACGATATTGAGGGTGAGG---CTAGG--AAAGCTATCAACTACATGCCCG                                                     | 1547 |
| PBV/Mongoose/KNA/M46/2017       | ATAATATTGACCGTATCG---CTAAG--GAATCTATCGAAGTCATGCCCG                                                     | 1547 |
| PBV/Mongoose/KNA/M58/2017       | ACGACATTGAGGGTGAGG---CTAGG--AAAGCTATCAACTACATGCCCG                                                     | 1547 |
| PBV/Mongoose/KNA/M67/2017       | ACGACATTGAGGGTGAGG---CTAGG--AAAGCTATCAACTACATGCCCG                                                     | 1547 |
| PBV/Mongoose/KNA/M72/2017       | ACAAT-TTGAGAGAGATTGCTCTAGA--GAAG--ATCGAAGACATGCCAG                                                     | 1584 |
| PBV/Human/CHN/1-CHN-97/1997     | ATAATATCGAAAAATTAG---CAATG--GAAGCTACGGATCTCATGCCAG                                                     | 1558 |
|                                 | *            *                            *            **            *            *            ***** * |      |

|                                 |                                                                                |      |
|---------------------------------|--------------------------------------------------------------------------------|------|
| PBV-like/Mongoose/KNA/M17A/2017 | ATTATGGTGGCTTCGTTAATGATAAT-----ATGAAGCGC--AA                                   | 1593 |
| PBV/Mongoose/KNA/M17B/2017      | ATTTCTTAGGTTATACCAA-GACTTTACAGGG----GTTCAGCCC--AC                              | 1656 |
| PBV/Mongoose/KNA/M33/2017       | ACTTCCTTGGTTATACCAA-GACGCTGCAGAGCGTTGATGATGTC---GG                             | 1645 |
| PBV/Mongoose/KNA/M45/2017       | ACTTCTTGGGCTATACCAA-AACGCTGCAGGCAGATGCGGGAGGT---AT                             | 1593 |
| PBV/Mongoose/KNA/M46/2017       | ACTTTCTTGGTTATACCAA-GACCATGATGAAG---AATCAAGAC---GT                             | 1590 |
| PBV/Mongoose/KNA/M58/2017       | ACTTCTTGGGCTATACCAA-AACACTGCAGGCAGATGCAGGAGGT---AT                             | 1593 |
| PBV/Mongoose/KNA/M67/2017       | ACTTCTTGGGCTATACCAA-AACACTGCAGGCAGATGCAGGAGGT---AT                             | 1593 |
| PBV/Mongoose/KNA/M72/2017       | ACTTCTTAGGTTACACCAG-GCAACTCCAATC---TAAAGGAGACCCAGC                             | 1630 |
| PBV/Human/CHN/1-CHN-97/1997     | ACTTTCTAGGATATACCAA-GTCACT--AGG----TACAAGTGGCG--AT                             | 1599 |
|                                 | *   *                **   *                *                *                * |      |

|                                 |                                                                                               |      |
|---------------------------------|-----------------------------------------------------------------------------------------------|------|
| PBV-like/Mongoose/KNA/M17A/2017 | AGGAATCCTTTTCA---TGGAAGGTAGTCCAATACCTAATTAATC--GGTA                                           | 1638 |
| PBV/Mongoose/KNA/M17B/2017      | TGGTATATCCGAA---TGGTGGATAGTAAAATATCTGA--AATCGCATCG                                            | 1701 |
| PBV/Mongoose/KNA/M33/2017       | CGGTATA-TCCAAT--TGGTGGATAGTTAAATATTTGA--AGTCAAAGTA                                            | 1690 |
| PBV/Mongoose/KNA/M45/2017       | TGGTATA-TCGAAA--TGGTGGATAGTCAACTATCTGA--AGTCCAGGTA                                            | 1638 |
| PBV/Mongoose/KNA/M46/2017       | AGGCTTG-TC--ATCTTGGTGGATTGTTAATTATCTAA--AGTCTAAGTA                                            | 1635 |
| PBV/Mongoose/KNA/M58/2017       | TGGTATA-TCGAAA--TGGTGGATAGTCAACTATCTGA--AGTCCAGGTA                                            | 1638 |
| PBV/Mongoose/KNA/M67/2017       | TGGTATA-TCGAAA--TGGTGGATAGTCAACTATCTGA--AGTCCAGGTA                                            | 1638 |
| PBV/Mongoose/KNA/M72/2017       | TGGTGGAATCGAAAATTGGTGGGTAGTTAAATACCTGA--AGTCAAAGTA                                            | 1678 |
| PBV/Human/CHN/1-CHN-97/1997     | AGGGGTA-TCGGACAATGGTGGGTAGTTAACTACCTAA--AGTCTTTACG                                            | 1646 |
|                                 | **                                *                ***   *   *   **   *   **   *   *   *   ** |      |

|                                 |                                                     |      |
|---------------------------------|-----------------------------------------------------|------|
| PBV-like/Mongoose/KNA/M17A/2017 | AG-----CGAGATGGTGCAGTAAACCATT-----                  | 1662 |
| PBV/Mongoose/KNA/M17B/2017      | ATAAAATCGAGATG-----                                 | 1715 |
| PBV/Mongoose/KNA/M33/2017       | AGGA--TTGAGAT-----                                  | 1701 |
| PBV/Mongoose/KNA/M45/2017       | ACGG--TTGAGATGG-----                                | 1651 |
| PBV/Mongoose/KNA/M46/2017       | AAT---TCGAGATGGTGC-----                             | 1650 |
| PBV/Mongoose/KNA/M58/2017       | ACGG--TTGAGATGGTGCAGTAAACCATTAGATCATGAGCATGATCTAAC  | 1686 |
| PBV/Mongoose/KNA/M67/2017       | ACAG--TTGAGATGGTGC-----                             | 1654 |
| PBV/Mongoose/KNA/M72/2017       | ACT---TCGAGATGGT-----                               | 1691 |
| PBV/Human/CHN/1-CHN-97/1997     | CTAAA-TCCGGATGGTGCAGCAAACCATTAACTCCCTCACGGAGTTAACTG | 1695 |
|                                 | ***                                                 |      |

|                                 |     |      |
|---------------------------------|-----|------|
| PBV-like/Mongoose/KNA/M17A/2017 | --- |      |
| PBV/Mongoose/KNA/M17B/2017      | --- |      |
| PBV/Mongoose/KNA/M33/2017       | --- |      |
| PBV/Mongoose/KNA/M45/2017       | --- |      |
| PBV/Mongoose/KNA/M46/2017       | --- |      |
| PBV/Mongoose/KNA/M58/2017       | TGC | 1689 |
| PBV/Mongoose/KNA/M67/2017       | --- |      |
| PBV/Mongoose/KNA/M72/2017       | --- |      |
| PBV/Human/CHN/1-CHN-97/1997     | C-- | 1696 |
