# Supplementary material for: Detection and Molecular Characterization of Picobirnaviruses (PBVs) in the Mongoose: Identification of a Novel PBV Using an Alternative Genetic Code
Source: MDPI journal article supplement (doi:10.3390/v12010099), 2020-01-15
Supplement: s1 [file s1]

**Supplementary material S8.** Alignment of the putative RNA-dependent RNA polymerase (RdRp) of the novel mongoose PBV-like strain M17A with those of the prototype human genogroup-I PBV strain (PBV/Human/CHN/1-CHN-97/1997) and mongoose PBV GI strain PBV/Mongoose/KNA/M17B/2017. The M17A and M17B RdRp sequences were identified in the same fecal sample. The putative M17A RdRp translated using the mold mitochondrial genetic code and the invertebrate mitochondrial genetic code is shown with red and green font, respectively. Amino acid (aa) mismatches between putative RdRps generated using the alternative mitochondrial genetic codes (that of mold and invertebrate) are highlighted with blue. The three conserved domains in the putative RdRps are highlighted with yellow. A ‘\*’ denotes an identical aa residue, whilst ‘-’ indicates absence of an aa residue. Numbers to the right indicate the positions of the aa for respective PBV strains.

|                             |                                                      |     |
|-----------------------------|------------------------------------------------------|-----|
| PBV/Human/CHN/1-CHN-97/1997 | -MPKNNEVSFG-----EYFNLP-NPGLKSYFDRVRS GNTDEYRTT       | 38  |
| PBV-like/Mongoose/M17A/2017 | MIKKLNLK-----DYFILP-NQGLQSYLHKTEVGS DLDIRTP          | 36  |
| PBV-like/Mongoose/M17A/2017 | MIKKLNLK-----DYFILP-NQGLQSYLHKTEVGS DLDIRTP          | 36  |
| PBV/Mongoose/M17B/2017      | -MPKNVTSFINNHFVD TNYSYFTHSGFQSLRTYMGNVVKGPVKVYTAP    | 49  |
|                             | * * * * *                                            |     |
| PBV/Human/CHN/1-CHN-97/1997 | FFRGRSLDSILKAWKPTLDK--IENDWPTLLD FENDLAKVGP LSIQKPL  | 86  |
| PBV-like/Mongoose/M17A/2017 | FWDEKFPSSIMAMWQAVVDSSNLEAKLPGLYKFEMDMKSKVGP LSVQEP   | 86  |
| PBV-like/Mongoose/M17A/2017 | FWDEKFPSSIMAMWQAVVDSSNLEAKLPGLYKFEMDMKSKVGP LSVQEP   | 86  |
| PBV/Mongoose/M17B/2017      | FAKGSTIQSVLDDWQEV LVS--ISDKWPSLWEFEMDLASKVGP LSVQKPL | 97  |
|                             | * * * * *                                            |     |
| PBV/Human/CHN/1-CHN-97/1997 | AERLDDIESYYESISLDSEPIRSATAAVIAEWGDARGIQLRGQRKTVDN    | 136 |
| PBV-like/Mongoose/M17A/2017 | LSRI PDVMDYYNDP--KGQEVSPRAIACVKEEFKALGSLRLDADATVAE   | 134 |
| PBV-like/Mongoose/M17A/2017 | LSRI PDVMDYYNDP--KGQEVSPRAIACVKEEFKALGSLRLDADATVAE   | 134 |
| PBV/Mongoose/M17B/2017      | RERITDIAHYIEDILLSSTPIDPVAIKQTIGEFNKARGLRRRSQARTVEM   | 147 |
|                             | * * * * *                                            |     |
| PBV/Human/CHN/1-CHN-97/1997 | MKKS TNSGSPFFTKRRRAVDKTI PARLDY-----LGVQTKQFLNNSDW   | 179 |
| PBV-like/Mongoose/M17A/2017 | MRRNTNSGAPYFTRRSRVESESL-----ELAKTRSL                 | 165 |
| PBV-like/Mongoose/M17A/2017 | MRRNTNSGAPYFTRRSRVESESL-----ELAKTRSL                 | 165 |
| PBV/Mongoose/M17B/2017      | MKKS TNSGNPFFTKRRNVLDTFPCGVDTFNPVYYLQDAYQMLFNNDNF    | 197 |
|                             | * * * * *                                            |     |
| PBV/Human/CHN/1-CHN-97/1997 | YSAAVLGWRGQEGGPTDEDVKQRVVMFFPGVNVKELQFYQPAIEIAQKR    | 229 |
| PBV-like/Mongoose/M17A/2017 | AYPAVLGWSGQEGGIDTDNVKQRVVMFFQTNI AELQFYQPMIRAIQAH    | 215 |
| PBV-like/Mongoose/M17A/2017 | AYPAVLGWSGQEGGIDTDNVKQRVVMFFQTNI AELQFYQPMIRAIQAH    | 215 |
| PBV/Mongoose/M17B/2017      | KACAVIGWRGQEGGPEDEDVKQRVVMFFFAVNIEELTVYQPLIETFQRF    | 247 |
|                             | * * * * *                                            |     |
| PBV/Human/CHN/1-CHN-97/1997 | WITPAWIGMEAVDQRITKLFDTKAKSELVICTDFSKFDQHFNMKMDQDAAR  | 279 |
| PBV-like/Mongoose/M17A/2017 | KLIPAYLDHTAVDARTNLFDTKPTGDLVVETDFTKFDQSFWTPLQHVAR    | 265 |
| PBV-like/Mongoose/M17A/2017 | KLIPAYLDHTAVDARTNLFDTKPTGDLVVETDFTKFDQSFWTPLQHVAR    | 265 |
| PBV/Mongoose/M17B/2017      | NLVPANVSMESVDMEVTRLFDTKNSDDLVCCTDFTKFDQHFNVLDLQNAAK  | 297 |
|                             | * * * * *                                            |     |
| PBV/Human/CHN/1-CHN-97/1997 | TIIAALLNGSSES RDWLDNVFPVKYAI PLAMDG----VVKTGPHGMGSG  | 325 |
| PBV-like/Mongoose/M17A/2017 | AVYADWG---PQLDKWIREVFPVKYNI PMVLSNN----LISTGPHGMASG  | 308 |
| PBV-like/Mongoose/M17A/2017 | AVYADWG---PQLDKWIREVFPVKYNI PMVLSNN----LISTGPHGMASG  | 308 |
| PBV/Mongoose/M17B/2017      | TILQWIMSRENRVDWFENVFGIKYMI PLLWEAQADIVSVFHGPHGMASG   | 347 |
|                             | * * * * *                                            |     |
| PBV/Human/CHN/1-CHN-97/1997 | SGGTNFDETLTHRALQYEAQKAKSVLNPN SQCLGDDGILSYPGITVEDV   | 375 |
| PBV-like/Mongoose/M17A/2017 | SGGTNADESIAHRAHQHEAALASGQTLHPSSMAYGDDGILTFKGITVDKV   | 358 |
| PBV-like/Mongoose/M17A/2017 | SGGTNADESIAHRAHQHEAALASGQTLHPSSMAYGDDGILTFKGITVDKV   | 358 |
| PBV/Mongoose/M17B/2017      | SGGTNVDETLAHRAHQREAAIKSKQILNPHSMCLGDDGILSYPGITVNEV   | 397 |
|                             | * * * * *                                            |     |
| PBV/Human/CHN/1-CHN-97/1997 | TRSYSAHQEMNIDKQYASAHDC TYLRRWHHDDYRVDGVCVGYATYRAL    | 425 |
| PBV-like/Mongoose/M17A/2017 | VAQYTKHGVTMNESKQGASTTECVFLRRWHSMSYRKNGIMVGYSTFRAL    | 408 |
| PBV-like/Mongoose/M17A/2017 | VAQYTKHGVTMNESKQGASTTECVFLRRWHSMSYRKNGIMVGYSTFRAL    | 408 |
| PBV/Mongoose/M17B/2017      | VDAYQSHGQECNL SKQYASTQDCVYLRWHHKDYRDNGVCVGYSTCRAL    | 447 |
|                             | * * * * *                                            |     |
| PBV/Human/CHN/1-CHN-97/1997 | GRLCEQERYDPEVWVGPKMVALRQLSII ENCKYHPLREEFVNFCMKGDKY  | 475 |
| PBV-like/Mongoose/M17A/2017 | GRIMGQERYDYPKQWGPVMVIMRALSILENCNQHPLFEEFIEFVIKGDY    | 458 |
| PBV-like/Mongoose/M17A/2017 | GRIMGQERYDYPKQWGPVMVIMRALSILENCNQHPLFEEFIEFVIKGDY    | 458 |
| PBV/Mongoose/M17B/2017      | GRLRYLERFMDPEYWSQPMVALRQLSII ENCKYHPLRDEFAEFCKMRDKY  | 497 |
|                             | * * * * *                                            |     |
| PBV/Human/CHN/1-CHN-97/1997 | RLGLDIPGFLDNIEKLAMEATD LMPDFLG YTKSLGTSGDRGIGQWVVVNY | 525 |
| PBV-like/Mongoose/M17A/2017 | GLGTLKPGFLDNLQAMYAKARDVMPDYG GFVN--DNMKRKGILSWKVQY   | 506 |
| PBV-like/Mongoose/M17A/2017 | GLGTLKPGFLDNLQAMYAKARDVMPDYG GFVN--DNMKRKGILSWKVQY   | 506 |
| PBV/Mongoose/M17B/2017      | RLGIDIPGFLDKIATYAKESIDHMPDFLG YTKTLQGFKPTGISEWVIVKY  | 547 |
|                             | * * * * *                                            |     |
| PBV/Human/CHN/1-CHN-97/1997 | LKSLR                                                | 530 |
| PBV-like/Mongoose/M17A/2017 | LINR-                                                | 510 |
| PBV-like/Mongoose/M17A/2017 | LINR-                                                | 510 |
| PBV/Mongoose/M17B/2017      | LKSHR                                                | 552 |
|                             | *                                                    |     |
