# Supplementary material for: Detection and Molecular Characterization of Picobirnaviruses (PBVs) in the Mongoose: Identification of a Novel PBV Using an Alternative Genetic Code
Source: MDPI journal article supplement (doi:10.3390/v12010099), 2020-01-15
Supplement: s1 [file s1]

**Supplementary material S3.** GenBank accession numbers of partial gene segment-2 sequences (<201 bp) and deduced amino acid (aa) identities of the partial putative RNA-dependent RNA polymerase (RdRp) sequences of picobirnavirus (PBV) strains detected in the small Indian mongoose on the Caribbean island of St. Kitts.

| Mongoose PBV strain <sup>1</sup> | GenBank accession number | Maximum/significant deduced aa identity <sup>2</sup> with PBVs from other host species/sources ( <i>GenBank accession number</i> ) |
|----------------------------------|--------------------------|------------------------------------------------------------------------------------------------------------------------------------|
| PBV/Mongoose/KNA/M10/2017        | MN729472                 | 90% with human strain PBV/Human/CMRHP25A/CMR/2014 ( <i>QAA77624</i> )                                                              |
| PBV/Mongoose/KNA/M15/2017        | MN729473                 | 84% with guinea pig PBV strain GP6/India/2017 ( <i>AUB54549</i> )                                                                  |
| PBV/Mongoose/KNA/M21/2017        | MN729474                 | 100% with PBV strain from raw sewage sample ( <i>ACLI3389</i> )                                                                    |
| PBV/Mongoose/KNA/M26/2017        | MN729475                 | 89% with PBV strain from raw sewage sample ( <i>ACLI3497</i> )<br>87% with porcine PBV strain CHHN-B7 ( <i>AHM01745</i> )          |
| PBV/Mongoose/KNA/M31/2017        | MN729476                 | 65% with porcine PBV strain PBV_segment_S_VIRES_YN01_C2 ( <i>QBJ01804</i> )                                                        |
| PBV/Mongoose/KNA/M38/2017        | MN729477                 | 90% with canine PBV strain dog/BR-02/BRA/2004 ( <i>ACN25100</i> )                                                                  |
| PBV/Mongoose/KNA/M49/2017        | MN729478                 | 87% with murine PBV strain MPV3/NYC/Manhattan/poolP30 ( <i>AWB14662</i> )                                                          |
| PBV/Mongoose/KNA/M74/2017        | MN729479                 | 91% with porcine PBV strain PoPBV_segment_S_VIRES_NM02_C2 ( <i>QBJ01787</i> )                                                      |
| PBV/Mongoose/KNA/M83/2017        | MN729480                 | 83% with canine PBV strain dog/BR-02/BRA/2004 ( <i>ACN25100</i> )                                                                  |

<sup>1</sup> Mongoose PBV strains that were molecularly characterized for the complete/nearly complete gene segment-2 are not shown here.

<sup>2</sup> Deduced aa identities were determined using the BLASTp software (<https://blast.ncbi.nlm.nih.gov/Blast.cgi>, accessed 25<sup>th</sup> November 2019)
