# Supplementary material for: Detection and Molecular Characterization of Picobirnaviruses (PBVs) in the Mongoose: Identification of a Novel PBV Using an Alternative Genetic Code
Source: MDPI journal article supplement (doi:10.3390/v12010099), 2020-01-15
Supplement: s1 [file s1]

**Supplementary material S6.** Translation (5'-3', frame 2) of the novel mongoose PBV-like sequence M17A using an alternative mold mitochondrial genetic code. The translation frame was generated by the ORF finder (<https://www.ncbi.nlm.nih.gov/orffinder/>, accessed 24<sup>rd</sup> November 2019). The putative RNA-dependent RNA polymerase and corresponding coding sequence are shown with pink.

```

gtaa att ttc aaa att ttc tat ttc tat gaa att tta aat tgc gtg att tac tga aaa cgc
-   I   F   K   I   F   Y   F   Y   E   I   L   N   C   V   I   Y   W   K   R
tta cag tgg cag ata act gta tac att tca gga ggt tag ttt ctt gtg att aag aag cta
L   Q   W   Q   I   T   V   Y   I   S   G   G   -   F   L   M   I   K   K   L
aac ttg aag gac tat ttc atc ctt ccc aat cag ggt tta cag tct tat tta cac aag acg
N   L   K   D   Y   F   I   L   P   N   Q   G   L   Q   S   Y   L   H   K   T
gag gta ggt agc gac ctt gac att cgt act ccg ttt tgg gac gag aag cct aga tca tcg
E   V   G   S   D   L   D   I   R   T   P   F   W   D   E   K   P   R   S   S
atc atg gcg atg tga caa gct gtg gtt gac tct tca aat ctg gaa gct aag ttg cca ggt
I   M   A   M   W   Q   A   V   V   D   S   S   N   L   E   A   K   L   P   G
ttg tat aaa ttt gag atg gac atg aaa tca aaa gtc ggt cca ctg tcc gtc caa gaa ccc
L   Y   K   F   E   M   D   M   K   S   K   V   G   P   L   S   V   Q   E   P
tta cta aga cgg att ccc gac gta atg gac tat tat aac gat ccg aaa ggt cag gaa gtt
L   L   R   R   I   P   D   V   M   D   Y   Y   N   D   P   K   G   Q   E   V
agt ccg cga gca atc gca tgc gtt aag gaa gaa ttt aaa gca tta agg ggt ctg agg ttg
S   P   R   A   I   A   C   V   K   E   E   F   K   A   L   R   G   L   R   L
cgt gat gct gat gca act gtc gct gag atg cgc cgc aat act aat tcg ggc gct cct tat
R   D   A   D   A   T   V   A   E   M   R   R   N   T   N   S   G   A   P   Y
ttc act cgt cgg tca cgt gtc gag tcg gaa tcc cta gaa ttg gct aag act aga tcg tta
F   T   R   R   S   R   V   E   S   E   S   L   E   L   A   K   T   R   S   L
gca tat cca gca gtt tta ggg tgg aga gga caa gaa ggt ggt att gat act gat aac gtg
A   Y   P   A   V   L   G   W   R   G   Q   E   G   G   I   D   T   D   N   V
aaa caa cgc gtt gtt tga atg ttt cct ttc caa acg aac atc gcg gaa tta cag ttc tac
K   Q   R   V   V   W   M   F   P   F   Q   T   N   I   A   E   L   Q   F   Y
cag ccc atg atc cgg gcg att caa gca cat aaa ctg atc cct gcc tat ttg gat cat aca
Q   P   M   I   R   A   I   Q   A   H   K   L   I   P   A   Y   L   D   H   T
gca gtg gat gct cgg ata acg aat cta ttt gac acc aaa cct acg ggt gat ctt gta gtt
A   V   D   A   R   I   T   N   L   F   D   T   K   P   T   G   D   L   V   V
gaa acc gat ttc acc aag ttc gac cag tcg ttc tga aca cca tta caa cat gta gcg cgt
E   T   D   F   T   K   F   D   Q   S   F   W   T   P   L   Q   H   V   A   R
gct gtg tac gcc gac tga ggt cca caa ctt gat aag tga att aga gaa gta ttc ccg gta
A   V   Y   A   D   W   G   P   Q   L   D   K   W   I   R   E   V   F   P   V
aaa tat aat att ccc atg gta tta tcg aat aat ttg att tcc acc gga cca cac ggc atg
K   Y   N   I   P   M   V   L   S   N   N   L   I   S   T   G   P   H   G   M
gcg tcg gga tca ggg ggt act aat gct gat gag tcg att gca cac agg gcg tta cag cat
A   S   G   S   G   G   T   N   A   D   E   S   I   A   H   R   A   L   Q   H
gaa gct gct tta gcg tcg ggt cag act ctg cac cca tcc tca atg gca tat ggg gac gat
E   A   A   L   A   S   G   Q   T   L   H   P   S   S   M   A   Y   G   D   D
ggt atc tta acg ttc aag ggt atc acc gtt gat aaa gtg gta gca caa tat act aag cat
G   I   L   T   F   K   G   I   T   V   D   K   V   V   A   Q   Y   T   K   H
gga gtg acc atg aac gag agt aag cag gga gca agc act acc gag tgc gta ttc cta cgc
G   V   T   M   N   E   S   K   Q   G   A   S   T   T   E   C   V   F   L   R
cgt tga cac tct atg tcc tat cgt aag aac ggg att atg gta ggt gtt tat tcg acg ttc
R   W   H   S   M   S   Y   R   K   N   G   I   M   V   G   V   Y   S   T   F
cgg gct tta gga cgt ttg atg ggt caa gaa cgg tac tat gac cct aaa caa tga gga cca
R   A   L   G   R   L   M   G   Q   E   R   Y   Y   D   P   K   Q   W   G   P
gag atg gtt ata atg agg gcg ttg tcg ata cta gaa aat tgc aac caa cat cct ctg ttc
E   M   V   I   M   R   A   L   S   I   L   E   N   C   N   Q   H   P   L   F

```

|     |     |     |     |     |     |     |     |     |     |     |     |     |     |     |     |     |     |     |     |
|-----|-----|-----|-----|-----|-----|-----|-----|-----|-----|-----|-----|-----|-----|-----|-----|-----|-----|-----|-----|
| gaa | gag | ttt | att | gaa | ttt | gtc | atc | aaa | ggg | gat | aag | tac | gga | ttg | ggg | act | aaa | ctc | cca |
| E   | E   | F   | I   | E   | F   | V   | I   | K   | G   | D   | K   | Y   | G   | L   | G   | T   | K   | L   | P   |
| ggc | ttt | ttg | gat | aat | tta | cag | gca | atg | tac | gcc | aaa | gcc | aga | gat | gtg | atg | ccc | gat | tat |
| G   | F   | L   | D   | N   | L   | Q   | A   | M   | Y   | A   | K   | A   | R   | D   | V   | M   | P   | D   | Y   |
| ggg | ggc | ttc | gtt | aat | gat | aat | atg | aag | cgc | aaa | gga | atc | ctt | tca | tgg | aag | gta | gtc | caa |
| G   | G   | F   | V   | N   | D   | N   | M   | K   | R   | K   | G   | I   | L   | S   | W   | K   | V   | V   | Q   |
| tac | cta | att | aat | cgg | tta | gca | aga | tgg | tgc | agt | aaa | cca |     |     |     |     |     |     |     |
| Y   | L   | I   | N   | R   | -   | A   | R   | W   | C   | S   | K   | P   |     |     |     |     |     |     |     |
