# Supplementary material for: Detection and Molecular Characterization of Picobirnaviruses (PBVs) in the Mongoose: Identification of a Novel PBV Using an Alternative Genetic Code
Source: MDPI journal article supplement (doi:10.3390/v12010099), 2020-01-15
Supplement: s1 [file s1]

**Supplementary material S1.** Primers used for amplification of a significant portion (~1200 bp) of gene segment-2 of the mongoose picobirnavirus (PBV) strains.

| Primer name | Sequence (5' - 3')     | Nucleotide (nt) position<br>corresponding to gene segment-2<br>of prototype PBV genogroup-I<br>strain 1-CHN-97 | Reference |
|-------------|------------------------|----------------------------------------------------------------------------------------------------------------|-----------|
| PBV 1.2FP   | AAG GTC GGK CCR ATG T  | nt 283- nt 298                                                                                                 | 24        |
| PBV 1.2RP   | TTA TCC CYT TTC ATG CA | nt 1478-nt 1462                                                                                                | 24        |
| PicoB25     | TGG TGT GGA TGT TTC    | nt 665-nt 679                                                                                                  | 23        |
| PicoB43     | ART GYT GGT CGA ACT T  | nt 865-nt 850                                                                                                  | 23        |
