# Supplementary material for: Detection and Molecular Characterization of Picobirnaviruses (PBVs) in the Mongoose: Identification of a Novel PBV Using an Alternative Genetic Code
Source: MDPI journal article supplement (doi:10.3390/v12010099), 2020-01-15
Supplement: s1 [file s1]

**Supplementary material S2.** *Amplification of the 5'- and 3'- regions of gene segment-2/RdRp genes of the mongoose picobirnavirus (PBV) and PBV-like strains using a modified non-specific primer-based amplification method [13, 19].*

A single amino group-linked oligonucleotide primer (primer A, 5'- CCC TCG AGT ACT AAC TAG TTA ACT GAT CAC CTC TAG ACC TTT -3', 5'- end phosphorylated and 3'- end incorporated an NH<sub>2</sub> blocking group) was ligated to the 3'- ends of both strands of double-strand RNA (dsRNA) of the mongoose PBV and PBV-like strains using T4 RNA ligase (Takara Bio Inc., Japan) following the instructions of the manufacturer. After 17 hours of incubation at 80°C, the MinElute Gel Extraction Kit (Qiagen Sciences, USA) was used to purify and concentrate the ligated dsRNA. Thereafter, the 5'- region of gene segment-2 of the mongoose PBV and PBV-like strains and the 3'- portion of gene segment-2 of mongoose PBV strain M58 was amplified using an internal reverse primer and an internal forward primer (designed from the already obtained ~1200 bp gene segment-2 sequence of respective PBV/PBV-like strains), respectively, and a common end primer C (5'- GGT CTA GAG GTG ATC AGT TAA CTA GTT AGT ACT -3', complementary to primer-A) by the QIAGEN OneStep RT-PCR Kit (Qiagen Biosciences, USA) following manufacturer's instructions.
