# Supplementary material for: Detection and Molecular Characterization of Picobirnaviruses (PBVs) in the Mongoose: Identification of a Novel PBV Using an Alternative Genetic Code
Source: Viruses. 2020 Jan 15;12(1):99. doi: 10.3390/v12010099 (PMC7019992; doi:10.3390/v12010099)
Supplement: Supplementary file 1 [file viruses-12-00099-s001.zip]

Archive with 8 entries (8 files):
- Supplementary material S1.pdf
- Supplementary material S2.pdf
- Supplementary material S3.pdf
- Supplementary material S4.pdf
- Supplementary material S5.pdf
- Supplementary material S6.pdf
- Supplementary material S7.pdf
- Supplementary material S8.pdf
